# Supplementary material for: Innovative radiation oncology Together – Precise, Personalized, Human
Source: Springer Nature journal article supplement (doi:10.1007/s00066-021-01843-9), 2021-09-13
Supplement: MOESM3 [file 66_2021_1843_MOESM3_ESM.pdf]

## Initiation & Preparation

11.2018 – Drafting of [yDEGRO<sup>1</sup> white paper](#) on promotion of young clinicians and scientists in radiation oncology

02.2019 – Consolidation of white paper by AKRO<sup>2</sup> and initiation of vision development through a yDEGRO/AKRO retreat

06.2019 – Agreement on objectives/process of vision development and target audience of a yDEGRO/AKRO retreat with DEGRO<sup>3</sup> board

08.2019 – Instruction of retreat participants; provision of background material incl. visions of related organisations; and online survey among participants on vision keywords & weighting

## yDEGRO/AKRO Retreat, November 15<sup>th</sup> 2019, Frankfurt

- Keynotes by DEGRO, DKTK<sup>4</sup> and ESTRO<sup>5</sup> on experience and lessons learned during vision development
- Vision development in 9 subgroups, each consisting of 8 AKRO and yDEGRO representatives from medicine, biology and physics
- Vision presentations applying the [World-Café-Method](#) followed by subgroup revisions
- Consolidation of 9 visions into 3 visions by 3 groups
- Plenum discussions on 3 consolidated visions and voting on the final vision
- [Reporting of yDEGRO/AKRO retreat](#) and drafting of vision interpretation & programme by yDEGRO alumni representatives<sup>6</sup>

## Vision Interpretation & Programme

08.2020 – Drafting of interpretation & programme in 7 groups each consisting of 5 yDEGRO alumni representatives

11.2020 – Finalisation of draft interpretation & programme by yDEGRO/AKRO retreat participants

12.2020 – Agreement on final interpret. & programme with DEGRO board; commentary of associated boards of BVDST<sup>7</sup>, DGMP<sup>8</sup>, DeGBS<sup>9</sup>, ARO<sup>10</sup>

05.2021 – Dissemination of vision outcome; preparation of programme implementation by yDEGRO alumni

**Fig. 1** Development process of German radiotherapy & radiation oncology vision "Innovative Radiation Oncology Together – Precise, Personalized, Human".

<sup>1</sup>German Society for Radiation Oncology (DEGRO) working group of young clinicians and scientists and its <sup>6</sup>Alumni representatives as a link between young scientists and executives/leaders in radiotherapy & radiation oncology in Germany. <sup>2</sup>Representation of associate and full professors of DEGRO. <sup>3</sup>German Society for Radiation Oncology. <sup>4</sup>German Consortium for Translational Cancer Research. <sup>5</sup>European Society for Radiotherapy & Oncology. <sup>7</sup>Professional Association of German Radiation Oncologists. <sup>8</sup>German Society of Medical Physics. <sup>9</sup>German Society of Radiobiology Research. <sup>10</sup>Working Group Radiation Oncology of German Cancer Society.
